# Supplementary material
Source: publisher figshare collection journal article supplement (https://diabetesjournals.figshare.com/articles/dataset/_/12728423)
Supplement: Supplementary file 2 [file 1]

**Supplemental Table 1.** Eligibility Criteria

| Inclusion                           | Exclusion                                                                                                                                                           |
|-------------------------------------|---------------------------------------------------------------------------------------------------------------------------------------------------------------------|
| Type 1 diabetes or healthy controls | Type 2 diabetes or Maturity-onset diabetes of the young (MODY)                                                                                                      |
| 12-21 years of age                  | Resting blood pressure $\geq 140/90$ mm Hg                                                                                                                          |
| Diabetes duration 1-10 years        | Hemoglobin $< 9$ mg/dL                                                                                                                                              |
|                                     | Albumin-to-creatinine [UACR] $\geq 300$ mg/g                                                                                                                        |
|                                     | eGFR $< 60$ ml/min/1.73m <sup>2</sup>                                                                                                                               |
|                                     | HbA1c $> 11\%$ (97 mmol/mol),                                                                                                                                       |
|                                     | Smoking                                                                                                                                                             |
|                                     | Oral contraceptives                                                                                                                                                 |
|                                     | Plans to alter exercise or diet during the study                                                                                                                    |
|                                     | Pregnant or nursing                                                                                                                                                 |
|                                     | Use of medications affecting insulin sensitivity (oral or inhaled steroids, metformin, thiazolidinediones, or atypical antipsychotics)                              |
|                                     | Medications affecting renal function and energetics (renin-angiotensin aldosterone system inhibitors, diuretics, calcium channel blockers, and mineralocorticoids). |

Although not formal exclusion criteria we confirmed that no participants were prescribed sodium-glucose transport protein 2 (SGLT2) inhibitors or glucagon-like peptide-1 (GLP-1) receptor agonists. None of the participants had pre-existing kidney disease.

**Supplemental Table 2** BOLD MRI Parameters

| Parameters               | Value                   |
|--------------------------|-------------------------|
| Field-of-VIEW (FOV) Read | 400 mm                  |
| FOV Phase                | 100%                    |
| Slice thickness          | 5 mm                    |
| Repetition time (TR)     | 61 ms                   |
| Echo time (TE)           | 4.92, 9.84, ...39.36 ms |
| Average                  | 1                       |
| Flip angle               | 30°                     |
| Fat suppression          | On                      |
| Measurements             | 1                       |
| Resolution               | 192 x 192               |
| Number of Slices         | 5                       |
| Bandwidth                | 280 Hz / pixel          |

**Supplemental Table 3** RO<sub>2</sub>:GFR (normalized by BSA) Stratified by T1D Status

|                                                                | <b>T1D<br/>(n=50)</b> | <b>Controls<br/>(n=20)</b> | <b><i>p</i>-value</b> | <b><i>Adjusted<br/>p</i>-value*</b> |
|----------------------------------------------------------------|-----------------------|----------------------------|-----------------------|-------------------------------------|
| <i>RO<sub>2</sub>:GFR by whole-kidney, cortex and medulla</i>  |                       |                            |                       |                                     |
| Whole-Kidney RO <sub>2</sub> :GFR (ml/min/1.73m <sup>2</sup> ) | 0.25 ± 0.04           | 0.31 ± 0.03                | <0.0001               | 0.0005                              |
| Cortex RO <sub>2</sub> :GFR (ml/min/1.73m <sup>2</sup> )       | 0.27 ± 0.05           | 0.34 ± 0.03                | <0.0001               | 0.008                               |
| Medullary RO <sub>2</sub> :GFR (ml/min/1.73m <sup>2</sup> )    | 0.21 ± 0.04           | 0.26 ± 0.03                | <0.0001               | 0.005                               |

Data are presented as mean ± SD. \* Data are adjusted for sex and HbA1c for RO<sub>2</sub>:GFR
